# Supplementary material for: Selection and validation of reference genes for quantitative expression analysis of miRNAs and mRNAs in Poplar
Source: PubMed Central journal article supplement (PMC6451301; doi:10.1186/s13007-019-0420-1), 2019-04-06
Supplement: 13007_2019_420_MOESM2_ESM.pdf [file 13007_2019_420_MOESM2_ESM.pdf]

Figure S3: The sequence similarity of candidate reference genes compared between 84K poplar and *Populus trichocarpa*.

1. ACT7 Sequence similarity: 100%

|                             |                                                                |     |
|-----------------------------|----------------------------------------------------------------|-----|
| J803231068_14-1.SEQ         | GTGATCTCCTTGCTCATTCGGTCAGCAATACCAGGGAACATAGTGAACCACCCTGAGC     | 60  |
| J803231068_14-2.SEQRC       | GTGATCTCCTTGCTCATTCGGTCAGCAATACCAGGGAACATAGTGAACCACCCTGAGC     | 60  |
| J803231068_14-3.SEQ         | GTGATCTCCTTGCTCATTCGGTCAGCAATACCAGGGAACATAGTGAACCACCCTGAGC     | 60  |
| J803231068_14-4.SEQ         | GTGATCTCCTTGCTCATTCGGTCAGCAATACCAGGGAACATAGTGAACCACCCTGAGC     | 60  |
| J803231068_14-5.SEQRC       | GTGATCTCCTTGCTCATTCGGTCAGCAATACCAGGGAACATAGTGAACCACCCTGAGC     | 60  |
| POTRI.001G309500-ACT7.SEQRC | GTGATCTCCTTGCTCATTCGGTCAGCAATACCAGGGAACATAGTGAACCACCCTGAGC     | 60  |
| Consensus                   | gtgatctccttgctcattcggtcagcaataccagggaaacatagtggaaccaccactgagc  |     |
| J803231068_14-1.SEQ         | ACAATGTTACCATAACAGATCCTTTCTAATATCCACATCACACTTCATGATTGAGTTGTAT  | 120 |
| J803231068_14-2.SEQRC       | ACAATGTTACCATAACAGATCCTTTCTAATATCCACATCACACTTCATGATTGAGTTGTAT  | 120 |
| J803231068_14-3.SEQ         | ACAATGTTACCATAACAGATCCTTTCTAATATCCACATCACACTTCATGATTGAGTTGTAT  | 120 |
| J803231068_14-4.SEQ         | ACAATGTTACCATAACAGATCCTTTCTAATATCCACATCACACTTCATGATTGAGTTGTAT  | 120 |
| J803231068_14-5.SEQRC       | ACAATGTTACCATAACAGATCCTTTCTAATATCCACATCACACTTCATGATTGAGTTGTAT  | 120 |
| POTRI.001G309500-ACT7.SEQRC | ACAATGTTACCATAACAGATCCTTTCTAATATCCACATCACACTTCATGATTGAGTTGTAT  | 120 |
| Consensus                   | acaatgttaccataacagatcctttctaataatccacatcacacttcatgattgagttgtat |     |
| J803231068_14-1.SEQ         | GTAGTCTCGTGGATG                                                | 135 |
| J803231068_14-2.SEQRC       | GTAGTCTCGTGGATG                                                | 135 |
| J803231068_14-3.SEQ         | GTAGTCTCGTGGATG                                                | 135 |
| J803231068_14-4.SEQ         | GTAGTCTCGTGGATG                                                | 135 |
| J803231068_14-5.SEQRC       | GTAGTCTCGTGGATG                                                | 135 |
| POTRI.001G309500-ACT7.SEQRC | GTAGTCTCGTGGATG                                                | 135 |
| Consensus                   | gtagtctcgtggatg                                                |     |

2. EIF4A Sequence similarity: 99.51%

|                            |                                                              |     |
|----------------------------|--------------------------------------------------------------|-----|
| J803231103_21-1.SEQ        | TACATTCATCGAATTGGTCGTTCTGGTCGTTTTGGACGGAAGGGTGTGCTATTAAC TTC | 60  |
| J803231103_21-2.SEQRC      | TACATTCATCGAATTGGTCGTTCTGGTCGTTTTGGACGGAAGGGTGTGCTATTAAC TTC | 59  |
| J803231103_21-3.SEQRC      | TACATTCATCGAATTGGTCGTTCTGGTCGTTTTGGACGGAAGGGTGTGCTATTAAC TTC | 60  |
| J803231103_21-4.SEQRC      | TACATTCATCGAATTGGTCGTTCTGGTCGTTTTGGACGGAAGGGTGTGCTATTAAC TTC | 60  |
| J803231103_21-5.SEQ        | TACATTCATCGAATTGGTCGTTCTGGTCGTTTTGGACGGAAGGGTGTGCTATTAAC TTC | 60  |
| POTRI.005G093900-EIF4A.SEQ | TACATTCATCGAATTGGTCGTTCTGGTCGTTTTGGACGGAAGGGTGTGCTATTAAC TTC | 60  |
| Consensus                  | tacattcatcgaattggtcgttctggtcgTTTTGGACGGAAGGGTGTGCTATTAAC TTC |     |
| J803231103_21-1.SEQ        | GTCAAAGTGATGATATCAGGATTTTAAGAGATATTGAACAGTATTACAGCACCAGATT   | 120 |
| J803231103_21-2.SEQRC      | GTCAAAGTGATGATATCAGGATTTTAAGAGATATTGAACAGTATTACAGCACCAGATT   | 119 |
| J803231103_21-3.SEQRC      | GTCAAAGTGATGATATCAGGATTTTAAGAGATATTGAACAGTATTACAGCACCAGATT   | 120 |
| J803231103_21-4.SEQRC      | GTCAAAGTGATGATATCAGGATTTTAAGAGATATTGAACAGTATTACAGCACCAGATT   | 120 |
| J803231103_21-5.SEQ        | GTCAAAGTGATGATATCAGGATTTTAAGAGATATTGAACAGTATTACAGCACCAGATT   | 120 |
| POTRI.005G093900-EIF4A.SEQ | GTCAAAGTGATGATATCAGGATTTTAAGAGATATTGAACAGTATTACAGCACCAGATT   | 120 |
| Consensus                  | gtcaaagtgatgatatcaggatTTTAAGAGATATTGAACAGTATTACAGCACCAGATT   |     |
| J803231103_21-1.SEQ        | GACGAAATGCCTATGA                                             | 136 |
| J803231103_21-2.SEQRC      | GACGAAATGCCTATGA                                             | 135 |
| J803231103_21-3.SEQRC      | GACGAAATGCCTATGA                                             | 136 |
| J803231103_21-4.SEQRC      | GACGAAATGCCTATGA                                             | 136 |
| J803231103_21-5.SEQ        | GACGAAATGCCTATGA                                             | 136 |
| POTRI.005G093900-EIF4A.SEQ | GACGAAATGCCTATGA                                             | 136 |
| Consensus                  | gacgaaatgcctatga                                             |     |

3. GAPDH Sequence similarity: 98.90%

|                            |                                                                 |     |
|----------------------------|-----------------------------------------------------------------|-----|
| J803231108_22-1.SEQ        | AACCGACTTCATPGGTGACAACCGGTC AAGTATCTTTGATGCCAAAGCTGGAATTGCTTT   | 60  |
| J803231108_22-2.SEQ        | AACCGACTTCATPGGTGACAACCGGTC AAGTATCTTTGATGCCAAAGCTGGAATTGCTTT   | 60  |
| J803231108_22-3.SEQRC      | AACCGACTTCATPGGTGACAACCGGTC AAGTATCTTTGATGCCAAAGCTGGAATTGCTTT   | 60  |
| J803231108_22-4.SEQRC      | AACCGACTTCATPGGTGACAACCGGTC AAGTATCTTTGATGCCAAAGCTGGAATTGCTTT   | 60  |
| J803231108_22-5.SEQ        | AACCGACTTCATPGGTGACAACCGGTC AAGTATCTTTGATGCCAAAGCTGGAATTGCTTT   | 60  |
| POTRI.012G094100-GAPDH.SEQ | AACCGACTTCATPGGTGACAACCGGTC AAGTATCTTTGATGCCAAAGCTGGAATTGCTTT   | 60  |
| Consensus                  | aaccgacttcattpggtgacaacccggTC AAGTATCTTTGATGCCAAAGCTGGAATTGCTTT |     |
| J803231108_22-1.SEQ        | GAACGATAACTATGTGAAGCTCGTTGCGTGGTATGACAATGAGTG                   | 105 |
| J803231108_22-2.SEQ        | GAACGATAACTATGTGAAGCTCGTTGCGTGGTATGACAATGAGTG                   | 105 |
| J803231108_22-3.SEQRC      | GAACGATAACTATGTGAAGCTCGTTGCGTGGTATGACAATGAGTG                   | 105 |
| J803231108_22-4.SEQRC      | GAACGATAACTATGTGAAGCTCGTTGCGTGGTATGACAATGAGTG                   | 105 |
| J803231108_22-5.SEQ        | GAACGATAACTATGTGAAGCTCGTTGCGTGGTATGACAATGAGTG                   | 105 |
| POTRI.012G094100-GAPDH.SEQ | GAACGATAACTATGTGAAGCTCGTTGCGTGGTATGACAATGAGTG                   | 105 |
| Consensus                  | gaacgataactatgtgaagctcgttgcgtggatgacaatgagtg                    |     |

#### 4. Histone Sequence similarity: 94.13%

```
J803231113_23-1.SEQ CTTAAAAATCCTGGGCAATTTACGAACAAGACCGCTGGAAAAGGTAACCTTGGCGGATCAAAAAG 60
J803231113_23-2.SEQ CTTAAAAATCCTGGGCAATTTACGAACAAGACCGCTGGAAAAGGTAACCTTGGCGGATCAAAAAG 60
J803231113_23-3.SEQRC CTTAAAAATCCTGGGCAATTTACGAACAAGACCGCTGGAAAAGGTAACCTTGGCGGATCAAAAAG 60
J803231113_23-4.SEQRC CTTAAAAATCCTGGGCAATTTACGAACAAGACCGCTGGAAAAGGTAACCTTGGCGGATCAAAAAG 60
J803231113_23-5.SEQRC CTTAAAAATCCTGGGCAATTTACGAACAAGACCGCTGGAAAAGGTAACCTTGGCGGATCAAAAAG 60
POTRI.005G072300-HISTONE.SEQRC CTTAAAAATCCTGGGCAATTTACGAACAAGACCGCTGGAAAAGGTAACCTTGGCGGATCAAAAAG 60
Consensus cttaaaaatcctggggcaatttcacgaacaagacgctggaaaaggaacttcgcggatcaaaaag
```

```
J803231113_23-1.SEQ CTCAGTACTCTTTCTGACTTACGGATTTACGAAGAGCAACAG 104
J803231113_23-2.SEQ CTCAGTACTCTTTCTGACTTACGGATTTACGAAGAGCAACAG 104
J803231113_23-3.SEQRC CTCAGTACTCTTTCTGACTTACGGATTTACGAAGAGCAACAG 104
J803231113_23-4.SEQRC CTCAGTACTCTTTCTGACTTACGGATTTACGAAGAGCAACAG 104
J803231113_23-5.SEQRC CTCAGTACTCTTTCTGACTTACGGATTTACGAAGAGCAACAG 104
POTRI.005G072300-HISTONE.SEQRC CTCAGTACTCTTTCTGACTTACGGATTTACGAAGAGCAACAG 104
Consensus ctcagtactcttctgatacttacggatttcacgaagagcaaacag
```

#### 5. PP2A-2 Sequence similarity: 99.30%

```
J803231004_1-2.SEQ TTTGGCGCACTGAACACTGTAACCACATTTCTTGTCTGGGACCAATTGTATCCTTCCATA 60
J803231005_1-3.SEQ TTTGGCGCACTGAACACTGTAACCACATTTCTTGTCTGGGACCAATTGTATCCTTCCATA 60
J803231006_1-4.SEQ TTTGGCGCACTGAACACTGTAACCACATTTCTTGTCTGGGACCAATTGTATCCTTCCATA 60
J803231007_1-5.SEQ TTTGGCGCACTGAACACTGTAACCACATTTCTTGTCTGGGACCAATTGTATCCTTCCATA 60
POTRI.015G068300-PP2A-2.SEQRC TTTGGCGCACTGAACACTGTAACCACATTTCTTGTCTGGGACCAATTGTATCCTTCCATA 60
Consensus tttggcgcaactgaacactgtaaccacatttcttgtctgggaccaattgtatccttccata
```

```
J803231004_1-2.SEQ ACAAGCTGGTGAGCTCTAGAAATGAGAGCGAGGCCATTAGTGTGGTTGAACTG 113
J803231005_1-3.SEQ ACAAGCTGGTGAGCTCTAGAAATGAGAGCGAGGCCATTAGTGTGGTTGAACTG 113
J803231006_1-4.SEQ ACAAGCTGGTGAGCTCTAGAAATGAGAGCGAGGCCATTAGTGTGGTTGAACTG 113
J803231007_1-5.SEQ ACAAGCTGGTGAGCTCTAGAAATGAGAGCGAGGCCATTAGTGTGGTTGAACTG 113
POTRI.015G068300-PP2A-2.SEQRC ACAAGCTGGTGAGCTCTAGAAATGAGAGCGAGGCCATTAGTGTGGTTGAACTG 113
Consensus acaagctggtgagctctagaaatgagagcgaggccattagtggttgaactg
```

#### 6. PP2A-A2 Sequence similarity: 98.69%

```
J803231008_2-1.SEQ CAATGCCTATCCTCTGCAAGCTCAACAATTGCTGGCAATAGTGATTGGGAAGCAATCA 60
J803231009_2-2.SEQ CAATGCCTATCCTCTGCAAGCTCAACAATTGCTGGCAATAGTGATTGGGATAGTAGATCA 60
J803231010_2-3.SEQ CAATGCCTATCCTCTGCAAGCTCAACAATTGCTGGCAATAGTGATTGGGATAGTAGATCA 60
J803231011_2-4.SEQRC CAATGCCTATCCTCTGCAAGCTCAACAATTGCTGGCAATAGTGATTGGGATAGTAGATCA 60
J803231012_2-5.SEQRC CAATGCCTATCCTCTGCAAGCTCAACAATTGCTGGCAATAGTGATTGGGATAGTAGATCA 60
POTRI.010G127500-PP2A-A2.SEQRC CAATGCCTATCCTCTGCAAGCTCAACAATTGCTGGCAATAGTGATTGGGATAGTAGATCA 60
Consensus caatgcctatcctctgcaagctcaacaattgctggcaatagtgattgggatagtatgatca
```

```
J803231008_2-1.SEQ ATCCCAATAACCTGATTGACTTGATCAAGCTTGCTGATAATGTTTCAGTCGCACATCAGGA 120
J803231009_2-2.SEQ ATCCCAATAACCTGATTGACTTGATCAAGCTTGCTGATAATGTTTCAGTCGCACATCAGGA 120
J803231010_2-3.SEQ ATCCCAATAACCTGATTGACTTGATCAAGCTTGCTGATAATGTTTCAGTCGCACATCAGGA 120
J803231011_2-4.SEQRC ATCCCAATAACCTGATTGACTTGATCAAGCTTGCTGATAATGTTTCAGTCGCACATCAGGA 120
J803231012_2-5.SEQRC ATCCCAATAACCTGATTGACTTGATCAAGCTTGCTGATAATGTTTCAGTCGCACATCAGGA 120
POTRI.010G127500-PP2A-A2.SEQRC ATCCCAATAACCTGATTGACTTGATCAAGCTTGCTGATAATGTTTCAGTCGCACATCAGGA 120
Consensus atcccaataaactgattgacttgatcaagcttgctgataatgtttcagtcgcacatcagga
```

```
J803231008_2-1.SEQ AATTCA 126
J803231009_2-2.SEQ AATTCA 126
J803231010_2-3.SEQ AATTCA 126
J803231011_2-4.SEQRC AATTCA 126
J803231012_2-5.SEQRC AATTCA 126
POTRI.010G127500-PP2A-A2.SEQRC AATTCA 126
Consensus aattca
```

## 7. RPS18 Sequence similarity: 99.74%

|                            |                                                         |                         |     |
|----------------------------|---------------------------------------------------------|-------------------------|-----|
| J803231013_3-1.SEQ         | AGGCTCATCATCTTATCAAATCCCTCTCTACAAATGCA                  | CCTTCAGATAAATGGATTGGAG  | 60  |
| J803231014_3-2.SEQ         | AGGCTCATCATCTTATCAAATCCCTCTCTACAAATGCA                  | CCTTCAGATAAATGGATTGGAG  | 60  |
| J803231015_3-3.SEQ         | AGGCTCATCATCTTATCAAATCCCTCTCTACAAATGCA                  | CCTTCAGATAAATGGATTGGAG  | 60  |
| J803231015_3-4.SEQ         | AGGCTCATCATCTTATCAAATCCCTCTCTACAAATGCA                  | CCTTCAGATAAATGGATTGGAG  | 60  |
| J803231015_3-5.SEQ         | AGGCTCATCATCTTATCAAATCCCTCTCTACAAATGCA                  | CCTTCAGATAAATGGATTGGAG  | 60  |
| POTRI.006G170500-RPS18.SEQ | AGGCTCATCATCTTATCAAATCCCTCTCTACAAATGCT                  | CCTTCAGATAAATGGATTGGAG  | 60  |
| Consensus                  | aggctcatcatcttatacaaatccctctctacaaatgca                 | ccttcagataaattggattggag |     |
|                            |                                                         |                         |     |
| J803231013_3-1.SEQ         | ACAATCAAAGCTCCAATTCTTTTGTGCTGCTGATGGCTTTGAGCAACGAATATT  | TGGTG                   | 120 |
| J803231014_3-2.SEQ         | ACAATCAAAGCTCCAATTCTTTTGTGCTGCTGATGGCTTTGAGCAACGAATATT  | TGGTG                   | 120 |
| J803231015_3-3.SEQ         | ACAATCAAAGCTCCAATTCTTTTGTGCTGCTGATGGCTTTGAGCAACGAATATT  | TGGTG                   | 120 |
| J803231015_3-4.SEQ         | ACAATCAAAGCTCCAATTCTTTTGTGCTGCTGATGGCTTTGAGCAACGAATATT  | TGGTG                   | 120 |
| J803231015_3-5.SEQ         | ACAATCAAAGCTCCAATTCTTTTGTGCTGCTGATGGCTTTGAGCAACGAATATT  | TGGTG                   | 119 |
| POTRI.006G170500-RPS18.SEQ | ACAATCAAAGCTCCAATTCTTTTGTGCTGCTGATGGCTTTGAGCAACGAATATT  | TGGTG                   | 120 |
| Consensus                  | acaatcaaagctccaattcttttgtgctgctgattggctttgagcaacgaatatt | tgggtg                  |     |
|                            |                                                         |                         |     |
| J803231013_3-1.SEQ         | GCATTG                                                  |                         | 126 |
| J803231014_3-2.SEQ         | GCATTG                                                  |                         | 126 |
| J803231015_3-3.SEQ         | GCATTG                                                  |                         | 126 |
| J803231015_3-4.SEQ         | GCATTG                                                  |                         | 126 |
| J803231015_3-5.SEQ         | GCATTG                                                  |                         | 125 |
| POTRI.006G170500-RPS18.SEQ | GCATTG                                                  |                         | 126 |
| Consensus                  | gcattg                                                  |                         |     |

## 8. UBQ10 Sequence similarity:99.22%

|                            |                                                              |                   |                         |            |     |
|----------------------------|--------------------------------------------------------------|-------------------|-------------------------|------------|-----|
| J803231028_6-1.SEQ         | GTTGATTTTTGCTGGGAAGCAGCTTGAAGATGGGAGA                        | A                 | ACTCTTGCTGACTACAACATTCA | 60         |     |
| J803231029_6-2_.SEQ        | GTTGATTTTTGCTGGGAAGCAGCTTGAAGATGGGAGA                        | A                 | ACTCTTGCTGACTACAACATTCA | 60         |     |
| J803231030_6-3.SEQ         | GTTGATTTTTGCTGGGAAGCAGCTTGAAGATGGGAGA                        | A                 | ACTCTTGCTGACTACAACATTCA | 60         |     |
| J803231031_6-4.SEQRC       | GTTGATTTTTGCTGGGAAGCAGCTTGAAGATGGGAGA                        | A                 | ACTCTTGCTGACTACAACATTCA | 60         |     |
| J803231032_6-5.SEQRC       | GTTGATTTTTGCTGGGAAGCAGCTTGAAGATGGGAGA                        | A                 | ACTCTTGCTGACTACAACATTCA | 60         |     |
| POTRI.001G418500-UBQ10.SEQ | GTTGATTTTTGCTGGGAAGCAGCTTGAAGATGGGAGA                        | A                 | ACTCTTGCTGACTACAACATTCA | 60         |     |
| Consensus                  | gttgatttttctgggaagcagcttgaagatgggagaa                        | a                 | actcttgctgactacaacattca |            |     |
|                            |                                                              |                   |                         |            |     |
| J803231028_6-1.SEQ         | GAAGGAGTCAACCCCTTCACT                                        | TGGTGC            | TGCGTCTCCGTGGAGGAATGCAG | TTTTTGTCAA | 120 |
| J803231029_6-2_.SEQ        | GAAGGAGTCAACCCCTTCACT                                        | TGGTGC            | TGCGTCTCCGTGGAGGAATGCAG | TTTTTGTCAA | 120 |
| J803231030_6-3.SEQ         | GAAGGAGTCAACCCCTTCACT                                        | TGGTGC            | TGCGTCTCCGTGGAGGAATGCAG | TTTTTGTCAA | 120 |
| J803231031_6-4.SEQRC       | GAAGGAGTCAACCCCTTCACT                                        | TGGTGC            | TGCGTCTCCGTGGAGGAATGCAG | TTTTTGTCAA | 120 |
| J803231032_6-5.SEQRC       | GAAGGAGTCAACCCCTTCACT                                        | TGGTGC            | TGCGTCTCCGTGGAGGAATGCAG | TTTTTGTCAA | 120 |
| POTRI.001G418500-UBQ10.SEQ | GAAGGAGTCAACCCCTTCACT                                        | TGGTGC            | TGCGTCTCCGTGGAGGAATGCAG | TTTTTGTCAA | 120 |
| Consensus                  | gaaggagtcaacccttcacttgggtgctgctctccgtggaggaatgcagatttttgtcaa |                   |                         |            |     |
|                            |                                                              |                   |                         |            |     |
| J803231028_6-1.SEQ         | GACTTTGACCGGAAAGACCATCAC                                     | CTGGAGGTCGAGAGCTC | GACACCATTGACAACGT       | 180        |     |
| J803231029_6-2_.SEQ        | GACTTTGACCGGAAAGACCATCAC                                     | CTGGAGGTCGAGAGCTC | GACACCATTGACAACGT       | 180        |     |
| J803231030_6-3.SEQ         | GACTTTGACCGGAAAGACCATCAC                                     | CTGGAGGTCGAGAGCTC | GACACCATTGACAACGT       | 180        |     |
| J803231031_6-4.SEQRC       | GACTTTGACCGGAAAGACCATCAC                                     | CTGGAGGTCGAGAGCTC | GACACCATTGACAACGT       | 180        |     |
| J803231032_6-5.SEQRC       | GACTTTGACCGGAAAGACCATCAC                                     | CTGGAGGTCGAGAGCTC | GACACCATTGACAACGT       | 180        |     |
| POTRI.001G418500-UBQ10.SEQ | GACTTTGACCGGAAAGACCATCAC                                     | CTGGAGGTCGAGAGCTC | GACACCATTGACAACGT       | 180        |     |
| Consensus                  | gactttgaccggaaagaccatcacctggaggtcgagagctcgacaccattgacaacgt   |                   |                         |            |     |
|                            |                                                              |                   |                         |            |     |
| J803231028_6-1.SEQ         | GAAGGCCAAGAT                                                 |                   |                         | 192        |     |
| J803231029_6-2_.SEQ        | GAAGGCCAAGAT                                                 |                   |                         | 192        |     |
| J803231030_6-3.SEQ         | GAAGGCCAAGAT                                                 |                   |                         | 192        |     |
| J803231031_6-4.SEQRC       | GAAGGCCAAGAT                                                 |                   |                         | 192        |     |
| J803231032_6-5.SEQRC       | GAAGGCCAAGAT                                                 |                   |                         | 192        |     |
| POTRI.001G418500-UBQ10.SEQ | GAAGGCCAAGAT                                                 |                   |                         | 192        |     |
| Consensus                  | gaaggccaagat                                                 |                   |                         |            |     |

### 9. ATPase Sequence similarity: 97.99%

|                             |                                                                 |     |
|-----------------------------|-----------------------------------------------------------------|-----|
| J803231073_15-1.SEQ         | ACTCATCCCACCCCTGATCTTACGGGATACATCACAGAGGGACAGATTTATATTGACAGG    | 60  |
| J803231073_15-2.SEQRC       | ACTCATCCCACCCCTGATCTTACGGGATACATCACAGAGGGACAGATTTATATTGACAGG    | 60  |
| J803231073_15-4.SEQ         | ACTCATCCCACCCCTGATCTTACGGGATACATCACAGAGGGACAGATTTATATTGACAGG    | 60  |
| J803231073_15-5.SEQRC       | ACTCATCCCACCCCTGATCTTACGGGATACATCACAGAGGGACAGATTTATATTGACAGG    | 60  |
| POTRI.004G177500-ATPASE.SEQ | ACTCATCCCACCCCTGATCTTACGGGATACATCACAGAGGGACAGATTTATATTGACAGG    | 60  |
| Consensus                   | actcatcccacccctgatcttacgggatacatcacagagggacagatttatattgacagg    |     |
|                             |                                                                 |     |
| J803231073_15-1.SEQ         | CAGCTACA CAATAGCAGATTTATCCTCCAATCAATGTCCTCCCATCTCTGCTCTCGTCTC   | 120 |
| J803231073_15-2.SEQRC       | CAGCTACA CAATAGCAGATTTATCCTCCAATCAATGTCCTCCCATCTCTGCTCTCGTCTC   | 120 |
| J803231073_15-4.SEQ         | CAGCTACA CAATAGCAGATTTATCCTCCAATCAATGTCCTCCCATCTCTGCTCTCGTCTC   | 120 |
| J803231073_15-5.SEQRC       | CAGCTACA CAATAGCAGATTTATCCTCCAATCAATGTCCTCCCATCTCTGCTCTCGTCTC   | 120 |
| POTRI.004G177500-ATPASE.SEQ | CAGCTACA CAATAGCAGATTTATCCTCCAATCAATGTCCTCCCATCTCTGCTCTCGTCTC   | 120 |
| Consensus                   | cagctacacaatagacagatttatcctccaatcaatgtcctcccatctctgtctctcgctctc |     |
|                             |                                                                 |     |
| J803231073_15-1.SEQ         | ATGAAGAGTGCC.ATTGG                                              | 137 |
| J803231073_15-2.SEQRC       | ATGAAGAGTGCC.ATTGG                                              | 138 |
| J803231073_15-4.SEQ         | ATGAAGAGTGCC.ATTGG                                              | 137 |
| J803231073_15-5.SEQRC       | ATGAAGAGTGCC.ATTGG                                              | 137 |
| POTRI.004G177500-ATPASE.SEQ | ATGAAGAGTGCC.ATTGG                                              | 137 |
| Consensus                   | atgaagagtgcc attgg                                              |     |

### 10. UBP Sequence similarity: 99.10%

|                          |                                                               |     |
|--------------------------|---------------------------------------------------------------|-----|
| J803231048_10-1.SEQ      | GGCTTTGTTTCATTCCSTAATCAGCAGGAGGCCAAAAGTGCTATTAATGACTAACTGGT   | 60  |
| J803231048_10-2.SEQ      | GGCTTTGTTTCATTCCSTAATCAGCAGGAGGCCAAAAGTGCTATTAATGACTAACTGGT   | 60  |
| J803231048_10-3.SEQRC    | GGCTTTGTTTCATTCCSTAATCAGCAGGAGGCCAAAAGTGCTATTAATGACTAACTGGT   | 60  |
| J803231048_10-4.SEQRC    | GGCTTTGTTTCATTCCSTAATCAGCAGGAGGCCAAAAGTGCTATTAATGACTAACTGGT   | 60  |
| J803231048_10-5.SEQRC    | GGCTTTGTTTCATTCCSTAATCAGCAGGAGGCCAAAAGTGCTATTAATGACTAACTGGT   | 60  |
| POTRI.006G279600-UBP.SEQ | GGCTTTGTTTCATTCCSTAATCAGCAGGAGGCCAAAAGTGCTATTAATGACTAACTGGT   | 60  |
| Consensus                | ggctttgtttcattccstaatcagcagaggccacaaaagtgctattaatgacttaactggt |     |
|                          |                                                               |     |
| J803231048_10-1.SEQ      | AAATGGCTTGGAAACAGGCAGATAAGATGCAATTGGGCAACTAAAGGTGT            | 110 |
| J803231048_10-2.SEQ      | AAATGGCTTGGAAACAGGCAGATAAGATGCAATTGGGCAACTAAAGGTGT            | 110 |
| J803231048_10-3.SEQRC    | AAATGGCTTGGAAACAGGCAGATAAGATGCAATTGGGCAACTAAAGGTGT            | 110 |
| J803231048_10-4.SEQRC    | AAATGGCTTGGAAACAGGCAGATAAGATGCAATTGGGCAACTAAAGGTGT            | 110 |
| J803231048_10-5.SEQRC    | AAATGGCTTGGAAACAGGCAGATAAGATGCAATTGGGCAACTAAAGGTGT            | 110 |
| POTRI.006G279600-UBP.SEQ | AAATGGCTTGGAAACAGGCAGATAAGATGCAATTGGGCAACTAAAGGTGT            | 110 |
| Consensus                | aaatggcttggaacaggcagataaagatgcaattgggcaactaaaggtgt            |     |

### 11. bHLH Sequence similarity: 97.73%

|                           |                                                              |     |
|---------------------------|--------------------------------------------------------------|-----|
| J803231078_16-1.SEQ       | ATCTGAATCGTGTAGTGCGTCTAGCTCCAAAGCATGTAGGGAAAAGTTGCGAAGGGATAG | 60  |
| J803231078_16-2.SEQRC     | ATCTGAATCGTGTAGTGCGTCTAGCTCCAAAGCATGTAGGGAAAAGTTGCGAAGGGATAG | 60  |
| J803231078_16-3.SEQRC     | ATCTGAATCGTGTAGTGCGTCTAGCTCCAAAGCATGTAGGGAAAAGTTGCGAAGGGATAG | 60  |
| J803231078_16-4.SEQRC     | ATCTGAATCGTGTAGTGCGTCTAGCTCCAAAGCATGTAGGGAAAAGTTGCGAAGGGATAG | 60  |
| J803231078_16-5.SEQRC     | ATCTGAATCGTGTAGTGCGTCTAGCTCCAAAGCATGTAGGGAAAAGTTGCGAAGGGATAG | 60  |
| POTRI.011G132400-bHLH.SEQ | ATCTGAATCGTGTAGTGCGTCTAGCTCCAAAGCATGTAGGGAAAAGTTGCGAAGGGATAG | 60  |
| Consensus                 | atctgaatcgtgtagtgcgctctagctccaaagcatgtagggaaaagctgcaagggatag |     |
|                           |                                                              |     |
| J803231078_16-1.SEQ       | GCTAAATGACAAGTTTATGGAATGGGCTCTATCTTGGATCCTGGGAGAGCTCCCAAAAC  | 120 |
| J803231078_16-2.SEQRC     | GCTAAATGACAAGTTTATGGAATGGGCTCTATCTTGGATCCTGGGAGAGCTCCCAAAAC  | 120 |
| J803231078_16-3.SEQRC     | GCTAAATGACAAGTTTATGGAATGGGCTCTATCTTGGATCCTGGGAGAGCTCCCAAAAC  | 120 |
| J803231078_16-4.SEQRC     | GCTAAATGACAAGTTTATGGAATGGGCTCTATCTTGGATCCTGGGAGAGCTCCCAAAAC  | 120 |
| J803231078_16-5.SEQRC     | GCTAAATGACAAGTTTATGGAATGGGCTCTATCTTGGATCCTGGGAGAGCTCCCAAAAC  | 120 |
| POTRI.011G132400-bHLH.SEQ | GCTAAATGACAAGTTTATGGAATGGGCTCTATCTTGGATCCTGGGAGAGCTCCCAAAAC  | 120 |
| Consensus                 | gctaaatgacaagtttatagaatgggctctatcttggagcctggaagaactcccaaaac  |     |
|                           |                                                              |     |
| J803231078_16-1.SEQ       | GGACAAGGCTGCTATTTTGGTTGATG                                   | 146 |
| J803231078_16-2.SEQRC     | GGACAAGGCTGCTATTTTGGTTGATG                                   | 146 |
| J803231078_16-3.SEQRC     | GGACAAGGCTGCTATTTTGGTTGATG                                   | 146 |
| J803231078_16-4.SEQRC     | GGACAAGGCTGCTATTTTGGTTGATG                                   | 146 |
| J803231078_16-5.SEQRC     | GGACAAGGCTGCTATTTTGGTTGATG                                   | 146 |
| POTRI.011G132400-bHLH.SEQ | GGACAAGGCTGCTATTTTGGTTGATG                                   | 146 |
| Consensus                 | ggacaaggctgctatTTTTGGTTGATG                                  |     |

12. *DNAJ 2* Sequence similarity: 99.78%

|                           |                                                               |     |
|---------------------------|---------------------------------------------------------------|-----|
| J803231003_1-1.SEQ        | AGGCAATTAATGACAAGGACCGTTGCCCTCAATGCAAGGGTGAGAAGGTGGTCCAAGAGA  | 60  |
| J803231088_18-1.SEQ       | AGGCAATTAATGACAAGGACCGTTGCCCTCAATGCAAGGGTGAGAAGGTGGTCCAAGAGA  | 60  |
| J803231088_18-2.SEQ       | AGGCAATTAATGACAAGGACCGTTGCCCTCAATGCAAGGGTGAGAAGGTGGTCCAAGAGA  | 60  |
| J803231088_18-3.SEQ       | AGGCAATTAATGACAAGGACCGTTGCCCTCAATGCAAGGGTGAGAAGGTGGTCCAAGAGA  | 60  |
| J803231088_18-4.SEQRC     | AGGCAATTAATGACAAGGACCGTTGCCCTCAATGCAAGGGTGAGAAGGTGGTCCAAGAGA  | 60  |
| J803231088_18-5.SEQ       | AGGCAATTAATGACAAGGACCGTTGCCCTCAATGCAAGGGTGAGAAGGTGGTCCAAGAGA  | 60  |
| POTRI.010G243100-DNAJ.SEQ | AGGCAATTAATGACAAGGACCGTTGCCCTCAATGCAAGGGTGAGAAGGTGGTCCAAGAGA  | 60  |
| Consensus                 | aggcaathtaagacaaggaccgttgccctcaatgcaagggtgagaaggtgggtccaagaga |     |
|                           |                                                               |     |
| J803231003_1-1.SEQ        | AAAAAGTTTGGAGTAGTTGTTGAGAAGGGCATGCAAAATGCACAGAGGATTACTTTCC    | 120 |
| J803231088_18-1.SEQ       | AAAAAGTTTGGAGTAGTTGTTGAGAAGGGCATGCAAAATGCACAGAGGATTACTTTCC    | 120 |
| J803231088_18-2.SEQ       | AAAAAGTTTGGAGTAGTTGTTGAGAAGGGCATGCAAAATGCACAGAGGATTACTTTCC    | 120 |
| J803231088_18-3.SEQ       | AAAAAGTTTGGAGTAGTTGTTGAGAAGGGCATGCAAAATGCACAGAGGATTACTTTCC    | 120 |
| J803231088_18-4.SEQRC     | AAAAAGTTTGGAGTAGTTGTTGAGAAGGGCATGCAAAATGCACAGAGGATTACTTTCC    | 120 |
| J803231088_18-5.SEQ       | AAAAAGTTTGGAGTAGTTGTTGAGAAGGGCATGCAAAATGCACAGAGGATTACTTTCC    | 120 |
| POTRI.010G243100-DNAJ.SEQ | AAAAAGTTTGGAGTAGTTGTTGAGAAGGGCATGCAAAATGCACAGAGGATTACTTTCC    | 120 |
| Consensus                 | aaaaagtttggagtagttgttggagaagggcatgcaaaatgcacagaggattactttcc   |     |
|                           |                                                               |     |
| J803231003_1-1.SEQ        | CTGGAGAGGC                                                    | 130 |
| J803231088_18-1.SEQ       | CTGGAGAGGC                                                    | 130 |
| J803231088_18-2.SEQ       | CTGGAGAGGC                                                    | 130 |
| J803231088_18-3.SEQ       | CTGGAGAGGC                                                    | 130 |
| J803231088_18-4.SEQRC     | CTGGAGAGGC                                                    | 130 |
| J803231088_18-5.SEQ       | CTGGAGAGGC                                                    | 130 |
| POTRI.010G243100-DNAJ.SEQ | CTGGAGAGGC                                                    | 130 |
| Consensus                 | ctggagaggc                                                    |     |

13. *U6-1* Sequence similarity: 98.54%

|                           |                                                              |     |
|---------------------------|--------------------------------------------------------------|-----|
| J803231018_4-2.SEQRC      | GTGACCTTTATTGCGACATCCACTTGGGTCTATATGTAATTCGTGGCGAGAATGTTGTCT | 60  |
| J803231018_4-3.SEQRC      | GTGACCTTTATTGCGACATCCACTTGGGTCTATATGTAATTCGTGGCGAGAATGTTGTCT | 60  |
| J803231018_4-4.SEQ        | GTGACCTTTATTGCGACATCCACTTGGGTCTATATGTAATTCGTGGCGAGAATGTTGTCT | 60  |
| J803231018_4-5.SEQ        | GTGACCTTTATTGCGACATCCACTTGGGTCTATATGTAATTCGTGGCGAGAATGTTGTCT | 60  |
| POTRI.001G166600-U6-1.SEQ | GTGACCTTTATTGCGACATCCACTTGGGTCTATATGTAATTCGTGGCGAGAATGTTGTCT | 60  |
| Consensus                 | gtgacctttattgcgacatccacttgggtctatatgtaattcgtggcgagaatgttgtct |     |
|                           |                                                              |     |
| J803231018_4-2.SEQRC      | TAATTGGGAGCTGGATTGGAGAGGGAGGAACTTCCACCACATATGACTCGTGTTCAG    | 120 |
| J803231018_4-3.SEQRC      | TAATTGGGAGCTGGATTGGAGAGGGAGGAACTTCCACCACATATGACTCGTGTTCAG    | 120 |
| J803231018_4-4.SEQ        | TAATTGGGAGCTGGATTGGAGAGGGAGGAACTTCCACCACATATGACTCGTGTTCAG    | 120 |
| J803231018_4-5.SEQ        | TAATTGGGAGCTGGATTGGAGAGGGAGGAACTTCCACCACATATGACTCGTGTTCAG    | 119 |
| POTRI.001G166600-U6-1.SEQ | TAATTGGGAGCTGGATTGGAGAGGGAGGAACTTCCACCACATATGACTCGTGTTCAG    | 120 |
| Consensus                 | taattgggagctggattggagagggaggaaacttccaccacatataactcgtgtttcag  |     |
|                           |                                                              |     |
| J803231018_4-2.SEQRC      | AA                                                           | 122 |
| J803231018_4-3.SEQRC      | AA                                                           | 122 |
| J803231018_4-4.SEQ        | AA                                                           | 122 |
| J803231018_4-5.SEQ        | AA                                                           | 121 |
| POTRI.001G166600-U6-1.SEQ | AA                                                           | 122 |
| Consensus                 | aa                                                           |     |

14. *U6-2* Sequence similarity: 99.22%

|                             |                                                               |     |
|-----------------------------|---------------------------------------------------------------|-----|
| J803231023_5-1.SEQ          | TTCCGCGGATGAAAGCATCACCATATTTGTTTTTCAGTTGGCCATTTACATATCTCTCTG  | 60  |
| J803231024_5-2.SEQ          | TTCCCTCGTATGAAAGCATCACCATATTTGTTTTTCAGTTGGCCATTTACATATCTCTCTG | 60  |
| J803231025_5-3.SEQRC        | TTCCCTCGTATGAAAGCATCACCATATTTGTTTTTCAGTTGGCCATTTACATATCTCTCTG | 60  |
| J803231026_5-4.SEQRC        | TTCCCTCGTATGAAAGCATCACCATATTTGTTTTTCAGTTGGCCATTTACATATCTCTCTG | 60  |
| J803231026_5-5.SEQ          | TTCCCTCGTATGAAAGCATCACCATATTTGTTTTTCAGTTGGCCATTTACATATCTCTCTG | 60  |
| POTRI.008G078400-U6-2.SEQRC | TTCCCTCGTATGAAAGCATCACCATATTTGTTTTTCAGTTGGCCATTTACATATCTCTCTG | 60  |
| Consensus                   | ttcctcgtatgaaagcatcaccatatttgTTTTTCAGTTGGCCATTTACATATCTCTCTG  |     |
|                             |                                                               |     |
| J803231023_5-1.SEQ          | TTTGTTCATTGCTATGTTTCATGTACCCATCAAGACAAGCTAAAAACCTCTATAATCAA   | 120 |
| J803231024_5-2.SEQ          | TTTGTTCATTGCTATGTTTCATGTACCCATCAAGACAAGCTAAAAACCTCTATAATCAA   | 120 |
| J803231025_5-3.SEQRC        | TTTGTTCATTGCTATGTTTCATGTACCCATCAAGACAAGCTAAAAACCTCTATAATCAA   | 120 |
| J803231026_5-4.SEQRC        | TTTGTTCATTGCTATGTTTCATGTACCCATCAAGACAAGCTAAAAACCTCTATAATCAA   | 120 |
| J803231026_5-5.SEQ          | TTTGTTCATTGCTATGTTTCATGTACCCATCAAGACAAGCTAAAAACCTCTATAATCAA   | 120 |
| POTRI.008G078400-U6-2.SEQRC | TTTGTTCATTGCTATGTTTCATGTACCCATCAAGACAAGCTAAAAACCTCTATAATCAA   | 120 |
| Consensus                   | tttgttcattgctatgtttcatgtacccatcaagacaagctaaaaacctctataatcaa   |     |
|                             |                                                               |     |
| J803231023_5-1.SEQ          | CTCCAGAAATTGAGCTTAACCACAACAGG                                 | 148 |
| J803231024_5-2.SEQ          | CTCCAGAAATTGAGCTTAACCACAACAGG                                 | 148 |
| J803231025_5-3.SEQRC        | CTCCAGAAATTGAGCTTAACCACAACAGG                                 | 148 |
| J803231026_5-4.SEQRC        | CTCCAGAAATTGAGCTTAACCACAACAGG                                 | 148 |
| J803231026_5-5.SEQ          | CTCCAGAAATTGAGCTTAACCACAACAGG                                 | 148 |
| POTRI.008G078400-U6-2.SEQRC | CTCCAGAAATTGAGCTTAACCACAACAGG                                 | 148 |
| Consensus                   | ctccagaattgagcttaaccacaacagg                                  |     |

15. 5.8S Sequence similarity: 99.66%

|            |                                                             |     |
|------------|-------------------------------------------------------------|-----|
| 5.8S-1.SEQ | ACGTCTGCCTGGGTGTCACGCATCGTCGCCCTCTCCCTCGGCTCGCGAGGGCGGGG    | 60  |
| 5.8S-2.SEQ | ACGTCTGCCTGGGTGTCACGCATCGTCGCCCTCTCCCTCGACTCGCGAGGGCGGGG    | 60  |
| 5.8S-3.SEQ | ACGTCTGCCTGGGTGTCACGCATCGTCGCCCTCTCCCTCGACTCGCGAGGGCGGGG    | 60  |
| 5.8S-4.SEQ | ACGTCTGCCTGGGTGTCACGCATCGTCGCCCTCTCCCTCGGCTCGCGAGGGCGGGG    | 60  |
| 5.8S-5.SEQ | ACGTCTGCCTGGGTGTCACGCATCGTCGCCCTCTCCCTCGACTCGCGAGGGCGGGG    | 60  |
| 5.8S.SEQ   | ACGTCTGCCTGGGTGTCACGCATCGTCGCCCTCTCCCTCGGCTCGCGAGGGCGGGG    | 60  |
| Consensus  | acgtctgcctgggtgtcacgcacgctcgccccctctcccctcgactcgcgagggcgggg |     |
|            |                                                             |     |
| 5.8S-1.SEQ | CGGATACTGGTCTCCCGCGCGCTCCCGCTCGCGGTGGGCCAAAATCGAGTCTCGGCGA  | 120 |
| 5.8S-2.SEQ | CGGATACTGGTCTCCCGCGCGCTCCCGCTCGCGGTGGGCCAAAATCGAGTCTCGGCGA  | 120 |
| 5.8S-3.SEQ | CGGATACTGGTCTCCCGCGCGCTCCCGCTCGCGGTGGGCCAAAATCGAGTCTCGGCGA  | 120 |
| 5.8S-4.SEQ | CGGATACTGGTCTCCCGCGCGCTCCCGCTCGCGGTGGGCCAAAATCGAGTCTCGGCGA  | 120 |
| 5.8S-5.SEQ | CGGATACTGGTCTCCCGCGCGCTCCCGCTCGCGGTGGGCCAAAATCGAGTCTCGGCGA  | 120 |
| 5.8S.SEQ   | CGGATACTGGTCTCCCGCGCGCTCCCGCTCGCGGTGGGCCAAAATCGAGTCTCGGCGA  | 120 |
| Consensus  | cggatactggtctcccgcgctcccgctcgcggtgggccaaaatcgagtctcggcga    |     |
|            |                                                             |     |
| 5.8S-1.SEQ | CGGTCGCCACGACGAGCGGTGGTTG                                   | 145 |
| 5.8S-2.SEQ | CGGTCGCCACGACGAGCGGTGGTTG                                   | 145 |
| 5.8S-3.SEQ | CGGTCGCCACGACGAGCGGTGGTTG                                   | 145 |
| 5.8S-4.SEQ | CGGTCGCCACGACGAGCGGTGGTTG                                   | 145 |
| 5.8S-5.SEQ | CGGTCGCCACGACGAGCGGTGGTTG                                   | 145 |
| 5.8S.SEQ   | CGGTCGCCACGACGAGCGGTGGTTG                                   | 145 |
| Consensus  | cggtcgccacgacgagcgggtggtt                                   |     |

16. miR171 Sequence similarity: 98.33%

|                 |                                                   |    |
|-----------------|---------------------------------------------------|----|
| miR171-1.SEQ    | AGATTGAGCCGCGCCAATATCAAAAAAAAAAAGTCTGTCTCGTCTCGT  | 49 |
| miR171-2.SEQ    | AGATTGAGCCGCGCCAATATCAAAAAAAAAAAGTCTGTCTCGTCTCGT  | 49 |
| miR171-3.SEQ    | AGATTGAGCCGCGCCAATATCAAAAAAAAAAG..TCTGTCTCGTCTCGT | 47 |
| miR171-4.SEQ    | AGATTGAGCCGCGCCAATATCAAAAAAAAAAAGTCTGTCTCGTCTCGT  | 49 |
| miR171-5.SEQ    | AGATTGAGCCGCGCCAATATCAAAAAAAAAA..GTCTGTCTCGTCTCGT | 48 |
| ptc-miR171c.SEQ | AGATTGAGCCGCGCCAATATCAAAAAAAAAA..GTCTGTCTCGTCTCGT | 48 |
| Consensus       | agattgagccgcgccaatatcaaaaaaaaaaagtctgtctcgtctcgt  |    |

17. miR403 Sequence similarity: 98.62%

|                       |                                                           |    |
|-----------------------|-----------------------------------------------------------|----|
| J803231058_12-2.SEQ   | CGCGTTAGATTACAGCACAAACTCGAAAAAAAAAAAAA..GTCTGTCGTCGTCTCGT | 55 |
| J803231058_12-3.SEQRC | CGCGTTAGATTACAGCACAAACTCGAAAAAAAAAAAAAAGTCTGTCGTCGTCTCGT  | 57 |
| J803231058_12-4.SEQRC | CGCGTTAGATTACAGCACAAACTCAAAAAAAAAAAAAAAGTCTGTCGTCGTCTCGT  | 57 |
| J803231058_12-5.SEQ   | CGCGTTAGATTACAGCACAAACTCGAAAAAAAAAAAAA..GTCTGTCGTCGTCTCGT | 56 |
| Ptc-miR403.SEQ        | CGCGTTAGATTACAGCACAAACTCGAAAAAAAAAAAAAAGTCTGTCGTCGTCTCGT  | 57 |
| Consensus             | cgcgttagattacagcacaaactcgaaaaaaaaaaaaaagtctgtcgtcgtctcgt  |    |

18. miR482 Sequence similarity: 98.69%

|                |                                                      |    |
|----------------|------------------------------------------------------|----|
| MIR482-1.SEQ   | CCTACTCCTCCATTCCAAAAAAAAAAAAAAAAAAGTCTGTCGTCGTCTCGT  | 50 |
| MIR482-2.SEQ   | CCTACTCCTCCATTCCAAAAAAAAAAAAAAAAAAGTCTGTCGTCGTCTCGT  | 50 |
| MIR482-3.SEQ   | CCTACTCCTCCATTCCAAAAAAAAAAAAAAAAA..GTCTGTCGTCGTCTCGT | 49 |
| MIR482-4.SEQ   | CCTACTCCTCCATTCCAAAAAAAAAAAAAAAAA..GTCTGTCGTCGTCTCGT | 49 |
| MIR482-5.SEQ   | CCTACTCCTCCATTCCAAAAAAAAAAAAAAAAA..GTCTGTCGTCGTCTCGT | 49 |
| ptc-miR482.SEQ | CCTACTCCTCCATTCCAAAAAAAAAAAAAAAAA..GTCTGTCGTCGTCTCGT | 49 |
| Consensus      | cctactcctccattccaaaaaaaaaaaaaaaaa gtctgtcgtcgtctcgt  |    |
